# Supplementary material for: Composition- and size-modulated porous bismuth–tin biphase alloys as anodes for advanced magnesium ion batteries
Source: Royal Society of Chemistry journal article supplement (doi:10.1039/c9nr05399a), 2019-01-01
Supplement: c9nr05399a1.pdf [file c9nr05399a1.pdf]

## Supporting Information

### **Composition- and size-modulated porous bismuth-tin biphase alloys as anodes for advanced magnesium ion batteries**

Jiazheng Niu,<sup>1,†</sup> Kuibo Yin,<sup>2,†</sup> Hui Gao,<sup>1</sup> Meijia Song,<sup>1</sup> Wensheng Ma,<sup>1</sup> Zhangquan Peng,<sup>3</sup> Zhonghua Zhang<sup>1,\*</sup>

<sup>1</sup>Key Laboratory for Liquid-Solid Structural Evolution and Processing of Materials (Ministry of Education), School of Materials Science and Engineering, Shandong University, Jingshi Road 17923, Jinan, 250061, P.R. China

<sup>2</sup>SEU-FEI Nano-Pico Center, Key Lab of MEMS of Ministry of Education, Southeast University, Nanjing 210096, P.R. China

<sup>3</sup>State Key Laboratory of Electroanalytical Chemistry, Changchun Institute of Applied Chemistry, Chinese Academy of Sciences, Changchun, Jilin 130022, P.R. China

†The authors equally contribute to this work.

\*Corresponding author. Email: zh\_zhang@sdu.edu.cn (Z. Zhang)

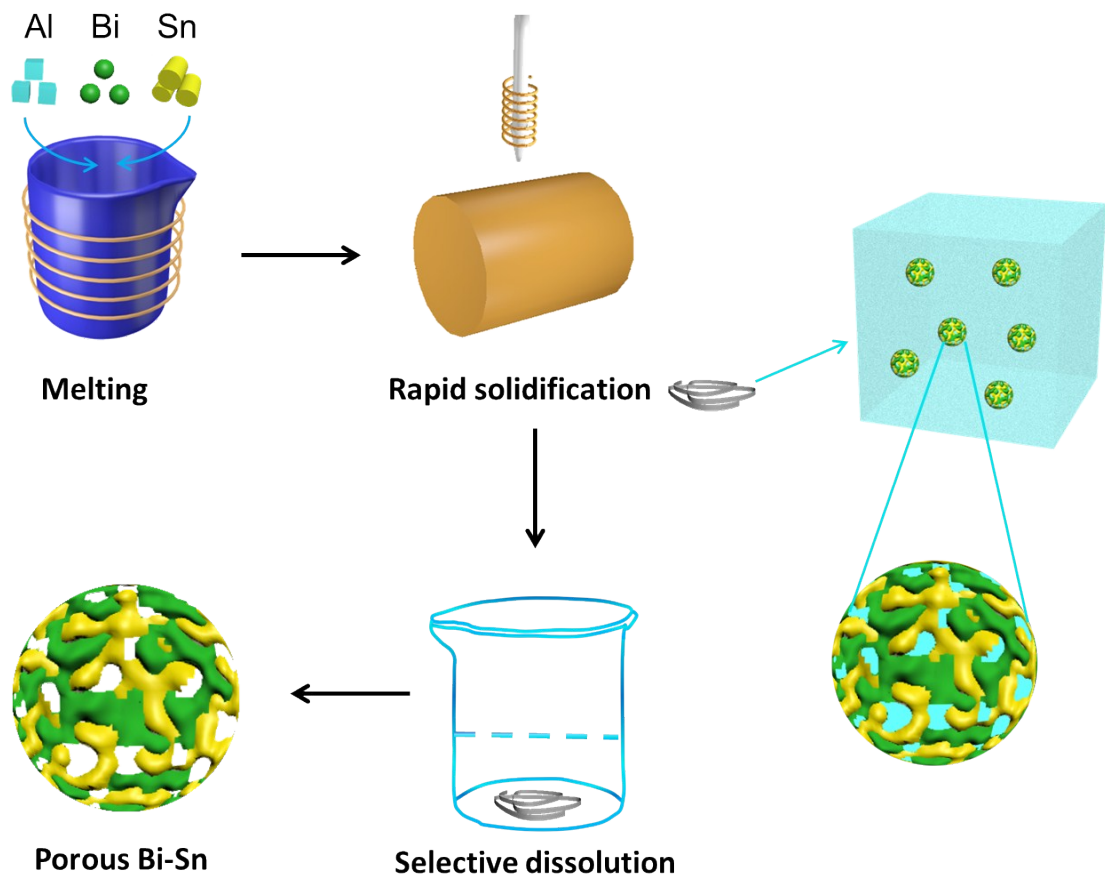

Fig. S1. Schematic illustration of the formation of biphasic P-Bi-Sn alloys through selective phase corrosion of rapidly solidified Al-Bi-Sn precursors. The triphase Al-Bi-Sn precursors with different Bi/Sn ratios were designed based upon positive mixing enthalpy between elements of Al, Bi and Sn.

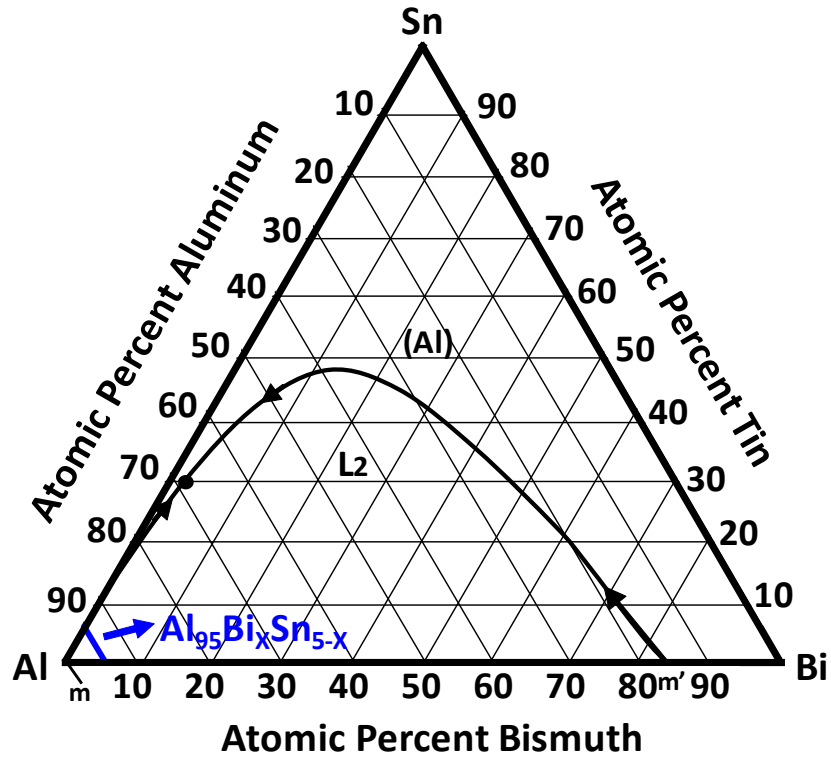

Fig. S2. Al-Bi-Sn phase diagram at 606.6 °C.<sup>1</sup> The compositions of Al-Bi-Sn alloys used in this work are highlighted by a blue line.

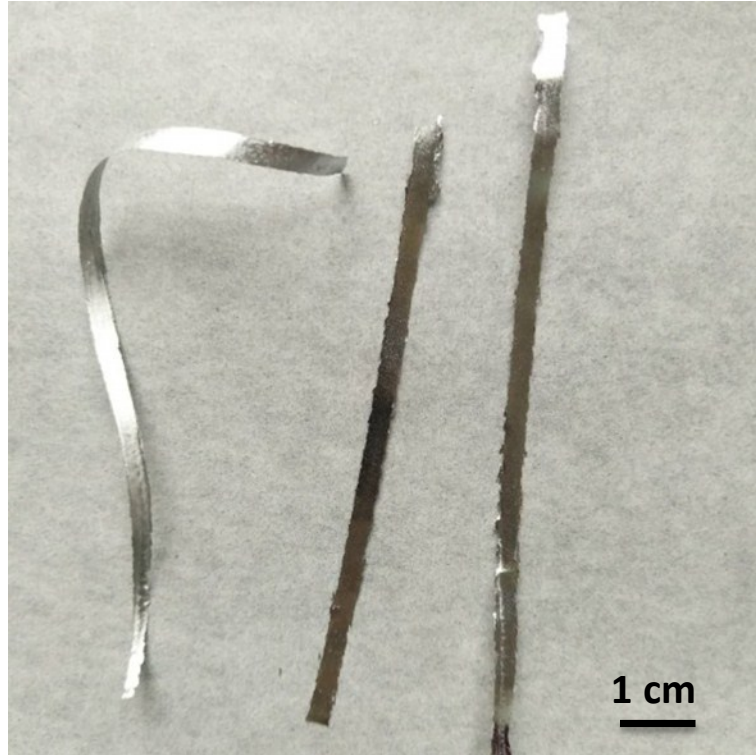

Fig. S3. Photograph showing the rapidly solidified Al-Bi-Sn alloy ribbons.

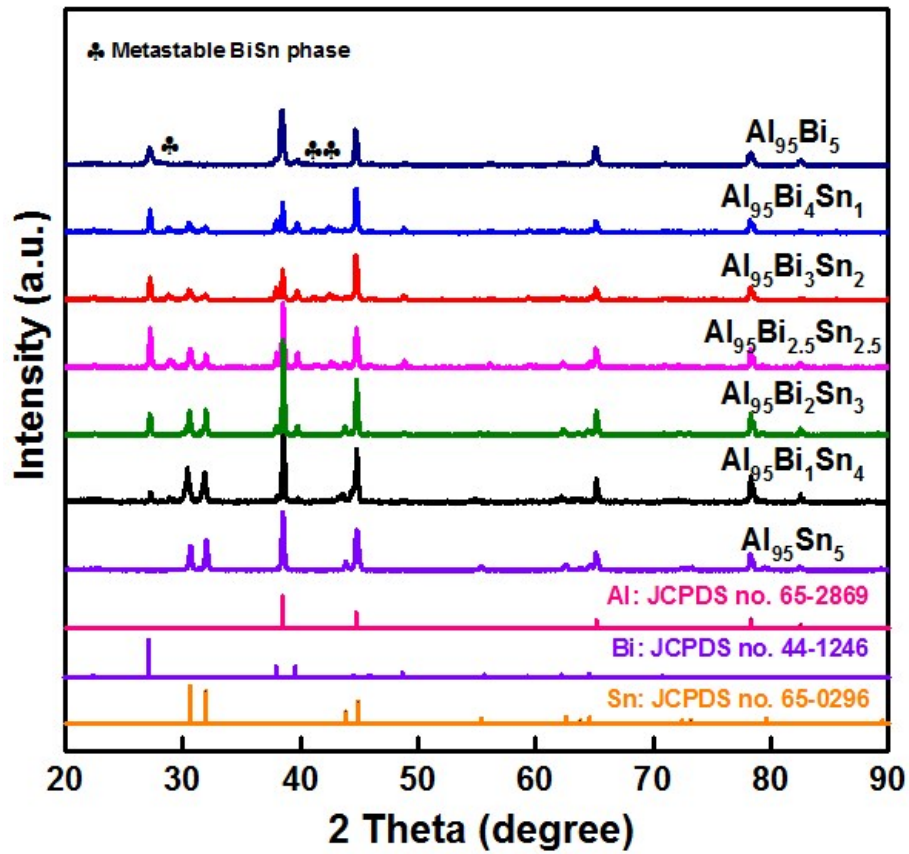

Fig. S4. XRD patterns of the rapidly solidified Al-Bi-Sn precursor alloys. For comparison, the XRD patterns of the rapidly solidified Al<sub>95</sub>Bi<sub>5</sub> and Al<sub>95</sub>Sn<sub>5</sub> are also shown, which are composed of Al/Bi and Al/Sn phases respectively.

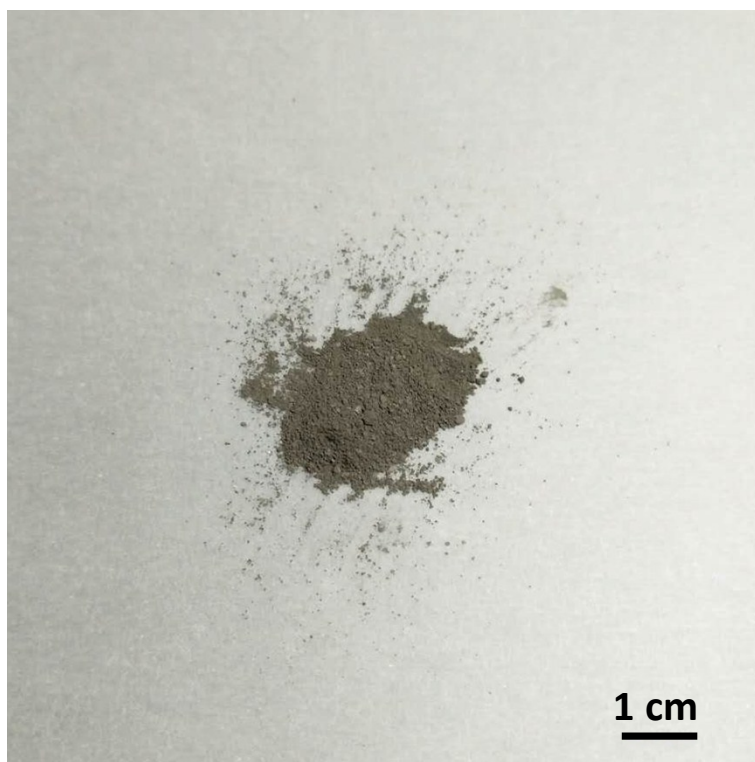

Fig. S5. Photograph obtained after selective phase corrosion showing the final products which are in the form of powders.

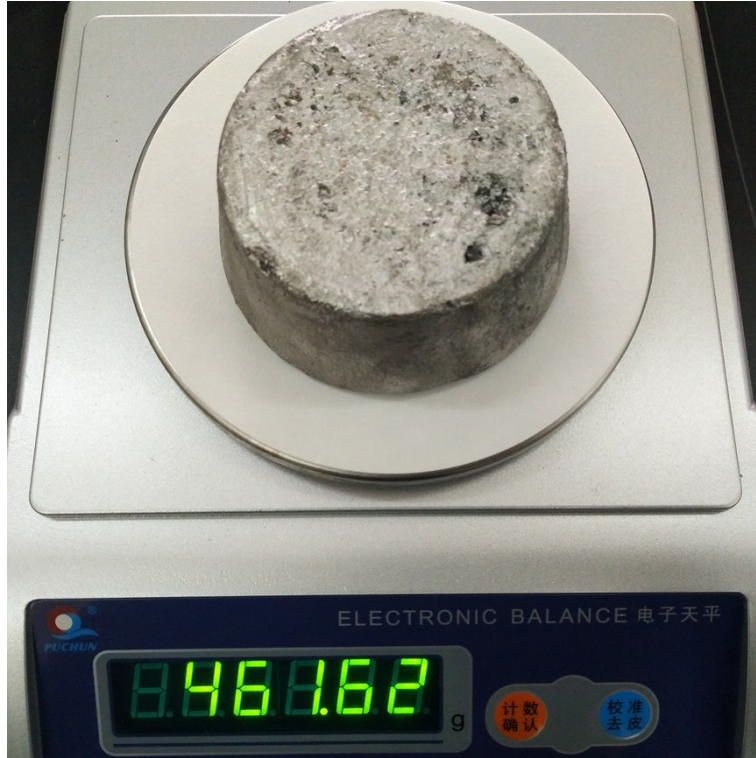

Fig. S6. Photograph showing the  $\text{Al}_{95}\text{Bi}_x\text{Sn}_y$  alloy ingot with a mass of more than 460 g. The present strategy could be easily scaled up.

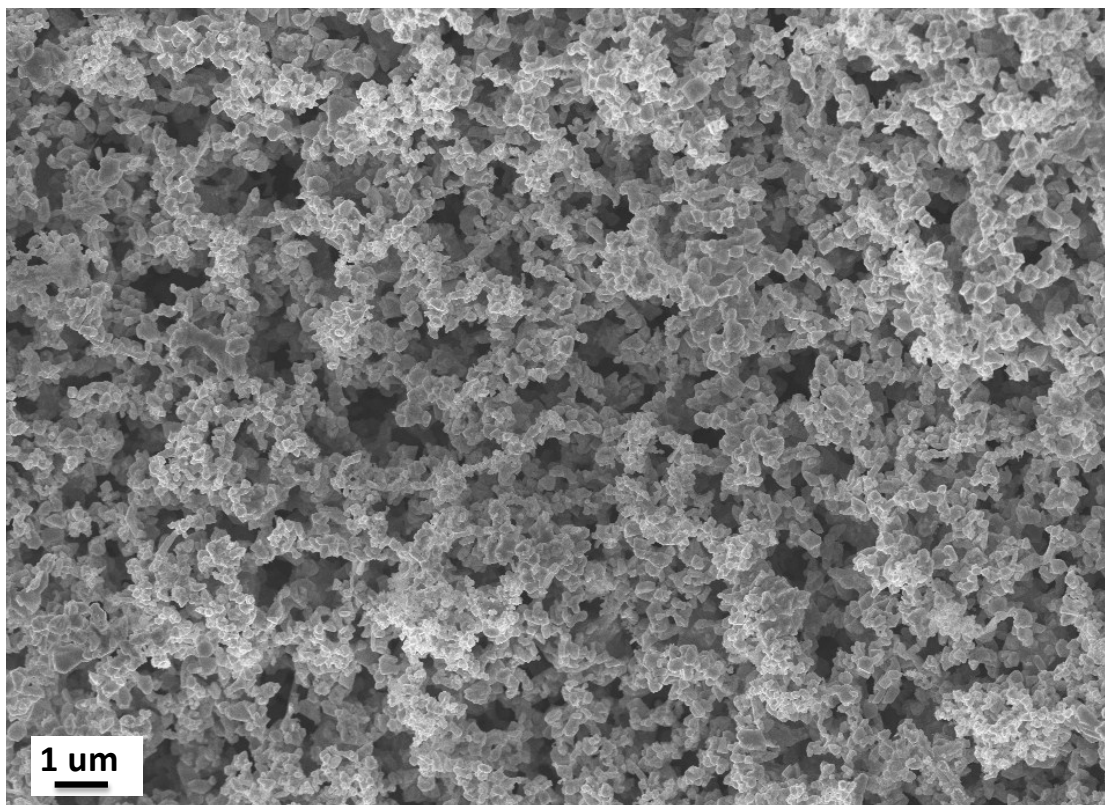

Fig. S7. SEM image at low magnification of P-Bi<sub>3</sub>Sn<sub>2</sub> alloy clearly showing the typical three-dimensional bi-continuous porous architecture.



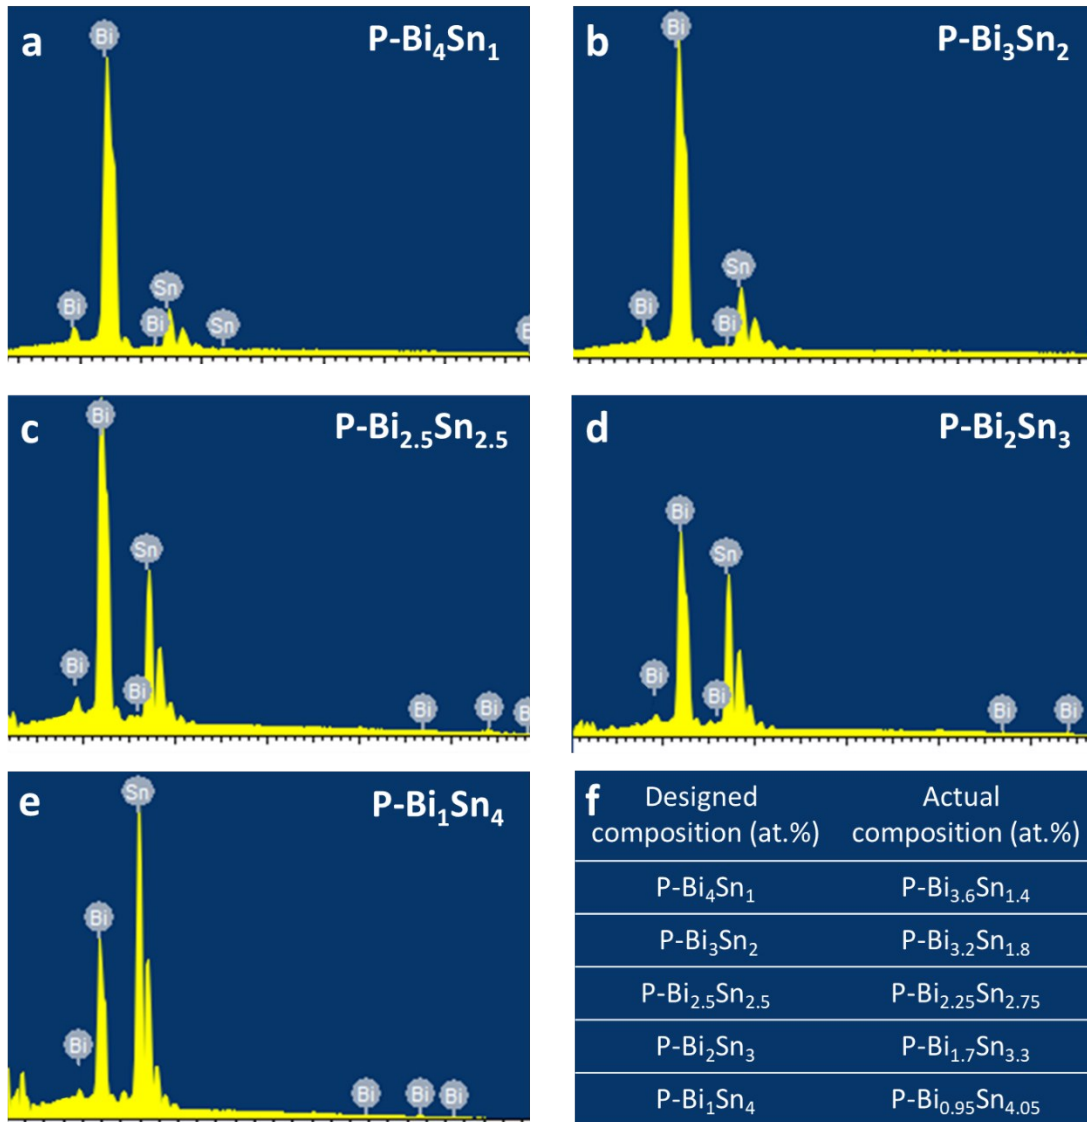

Fig. S8. (a-e) Typical EDX spectrums of biphasic P-Bi-Sn alloys. (f) Designed and actual compositions of P-Bi-Sn alloys.

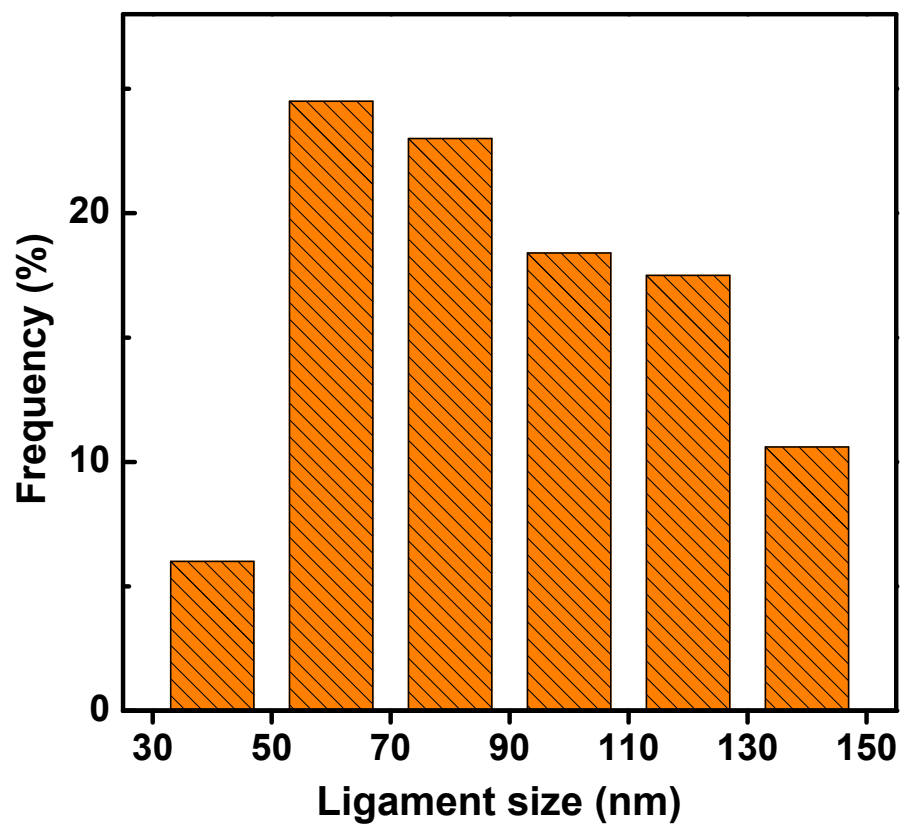

Fig. S9. Ligament size distribution of P-Bi<sub>3</sub>Sn<sub>2</sub> alloy measured from the TEM images.

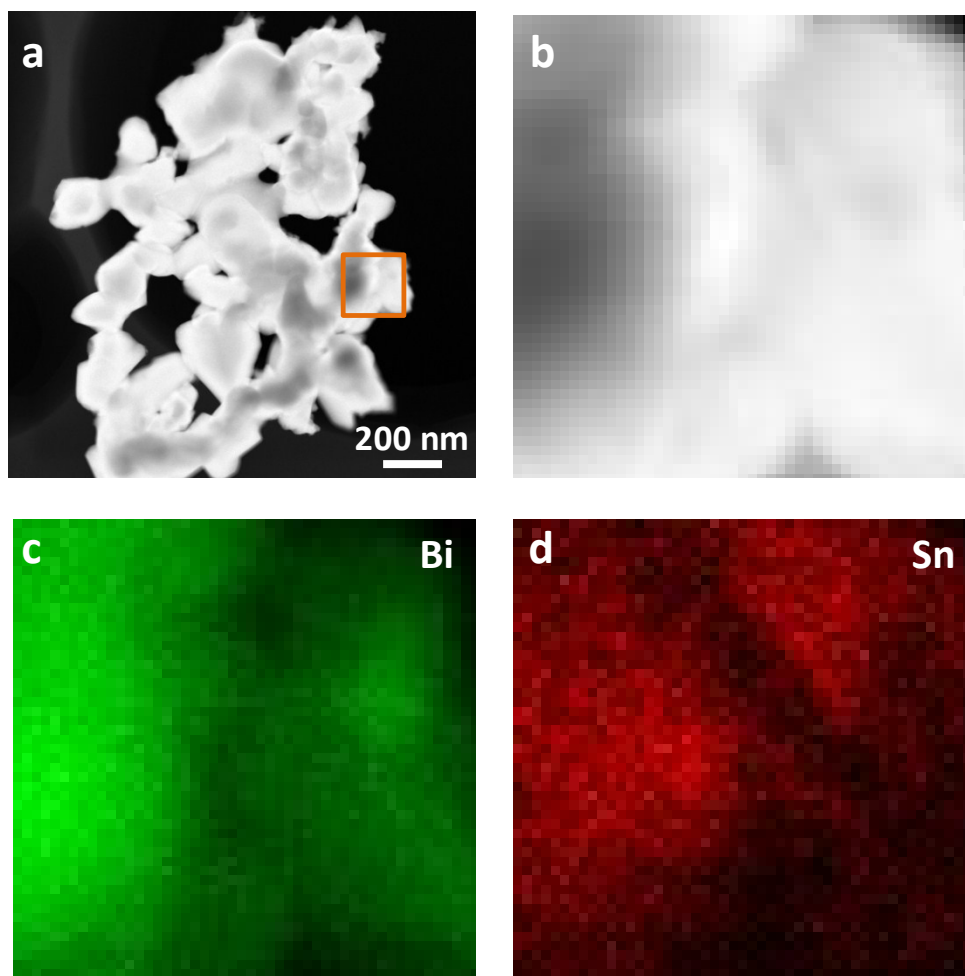

Fig. S10. (a) A HAADF-STEM image of P-Bi<sub>3</sub>Sn<sub>2</sub>. The area for EDX mapping is highlighted by an orange box. (b) Simultaneous HAADF-STEM image and (c,d) corresponding EDX mapping spectrums.

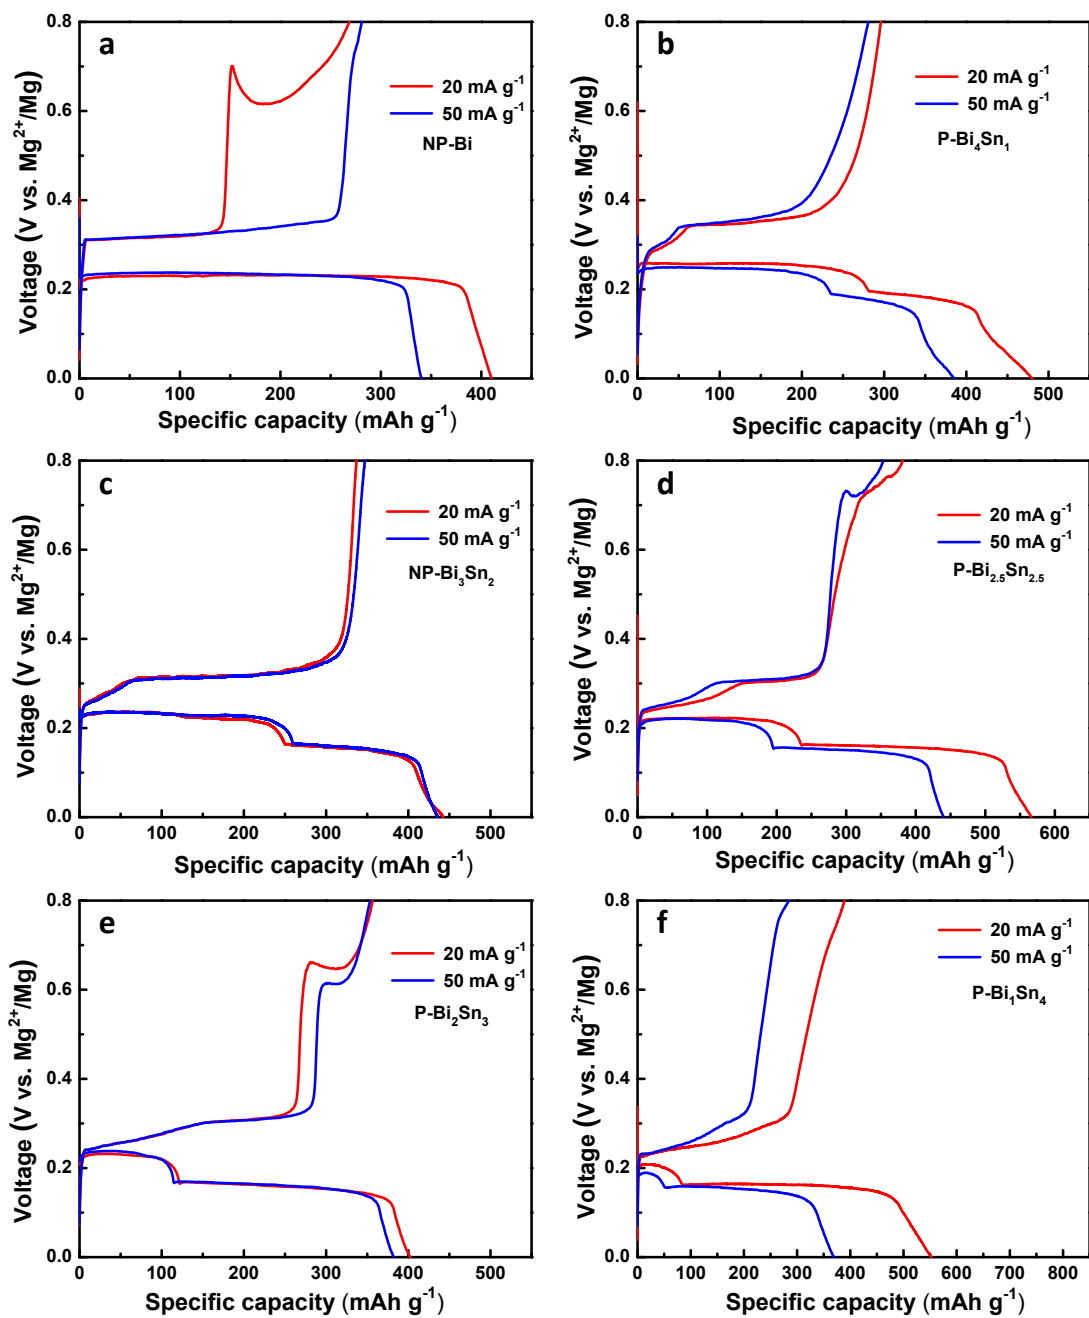

Fig. S11. Discharge/charge profiles of P-Bi-Sn and P-Bi electrodes at the current density of 20 and 50 mA g<sup>-1</sup>.

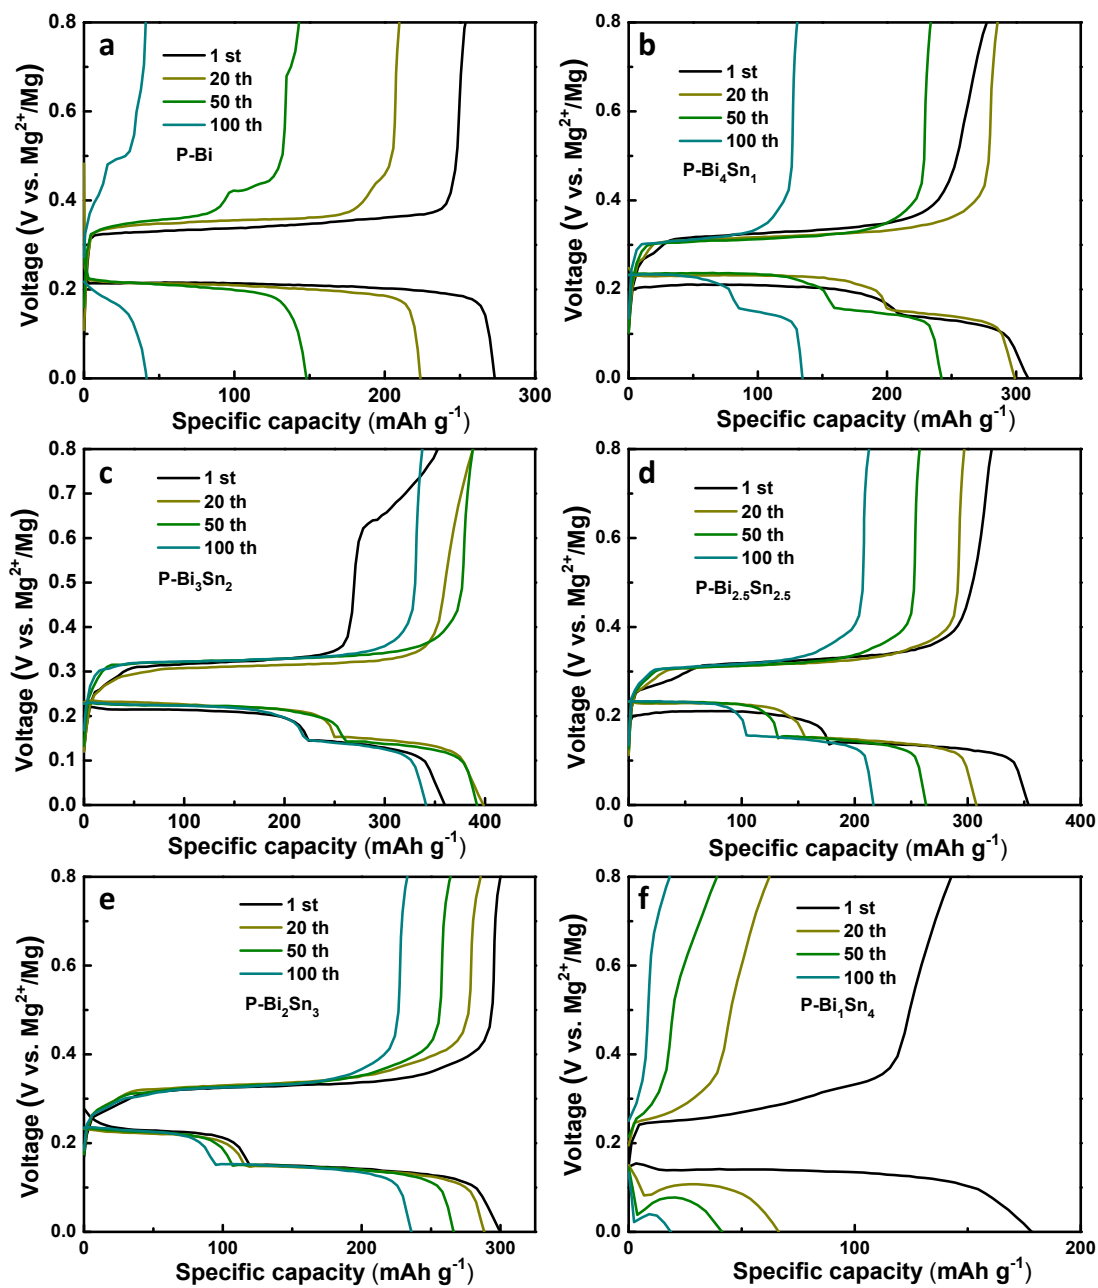

Fig. S12. Discharge/charge profiles of P-Bi-Sn and P-Bi electrodes in different cycles at the current density of  $200 \text{ mA g}^{-1}$ .

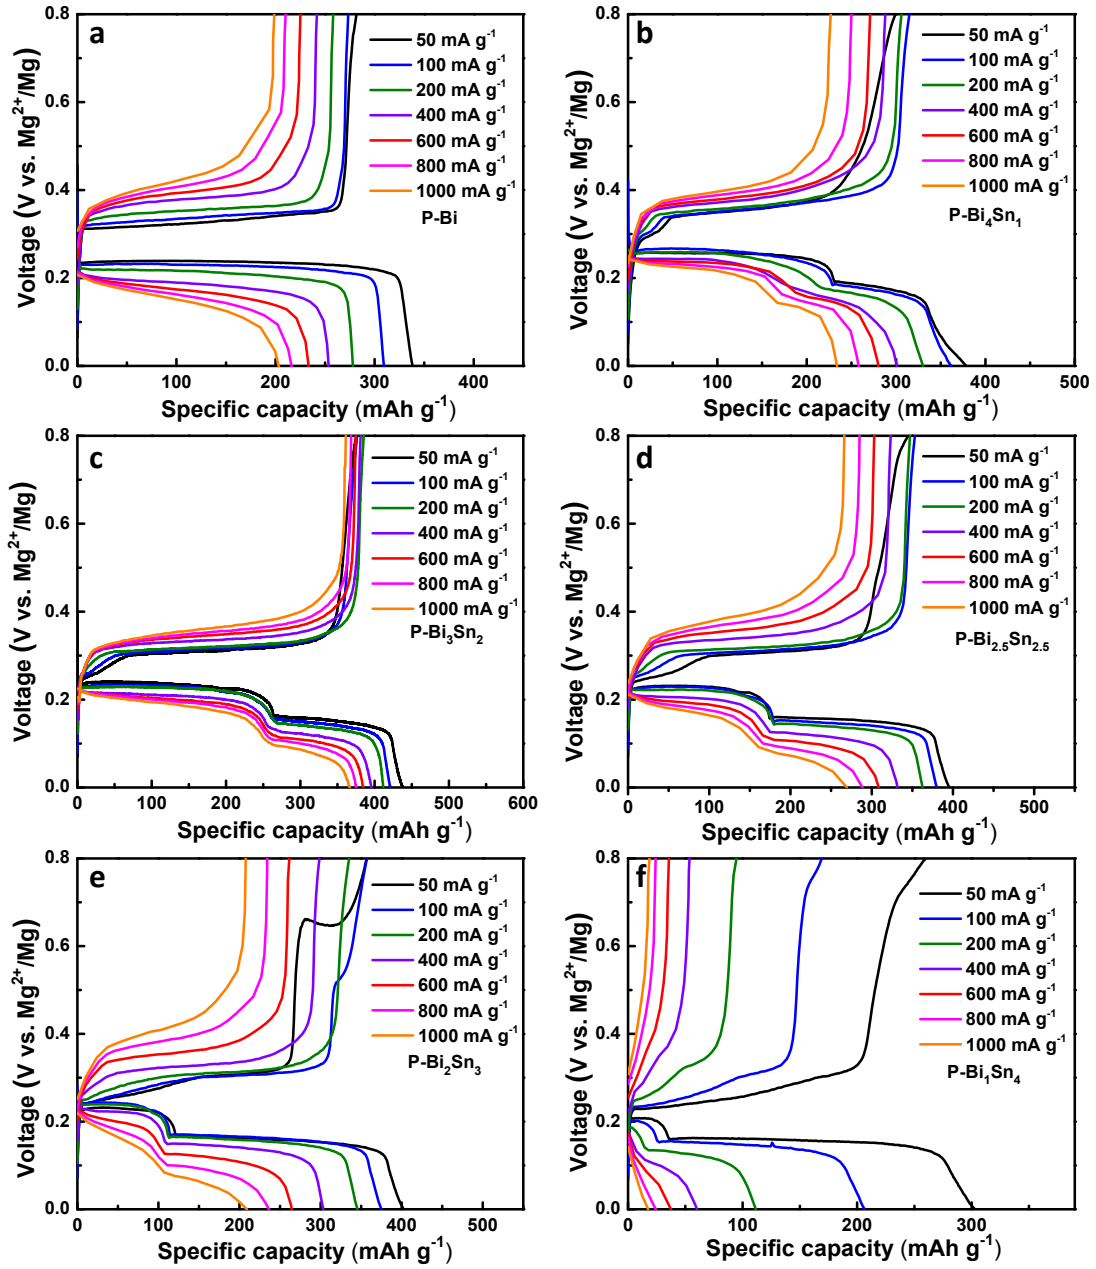

Fig. S13. Discharge/charge profiles of P-Bi-Sn and P-Bi electrodes at different current densities from 50 to 1000 mA g<sup>-1</sup>.

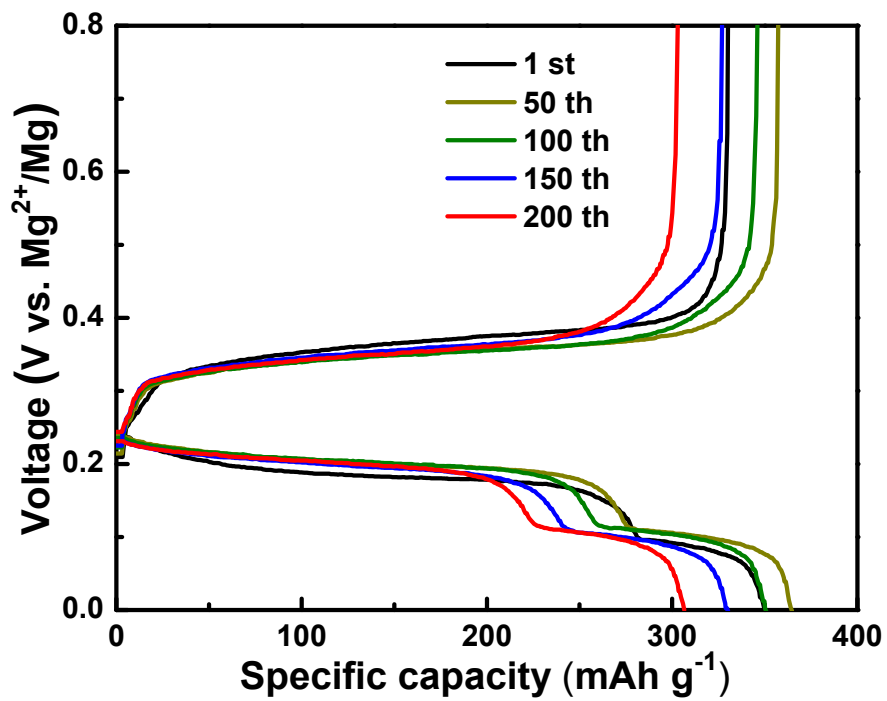

Fig. S14. Discharge/charge profiles of P-Bi<sub>3</sub>Sn<sub>2</sub> electrode in different cycles at the current density of 1000 mA g<sup>-1</sup>.

## References

1. H. X. Liu, C. P. Wang, Y. Yu, X. J. Liu, Y. Takaku, I. Ohnuma, R. Kainuma and K. Ishida, *J. Phase Equilib. Diffus.*, 2012, **33**, 9-19.
